# Supplementary material for: Near-UV photo-induced modification in isoreticular metal–organic frameworks
Source: Royal Society of Chemistry journal article supplement (doi:10.1039/c2jm15183a), 2011-12-14
Supplement: c2jm15183a.pdf [file c2jm15183a.pdf]

# Near-UV photo-induced modification in isorecticular metal-organic frameworks

Corinne A. Allen<sup>a</sup> and Seth M. Cohen\*<sup>a</sup>

*Department of Chemistry and Biochemistry, University of California, San Diego, La Jolla, California, 92093-0358, United States. Fax: +1-858-822-5598; Tel: +1-858-822-5596; E-mail: scohen@ucsd.edu*

## **ELECTRONIC SUPPLEMENTARY INFORMATION**

## Experimental Section

*General.* Dimethyl-2-hydroxyterephthalate and 2-((2-nitrobenzyl)oxy)terephthalic acid were synthesized as previously reported (K. K. Tanabe, C. A. Allen and S. M. Cohen, *Angew. Chem. Int. Ed.*, 2010, **49**, 9730-9733).

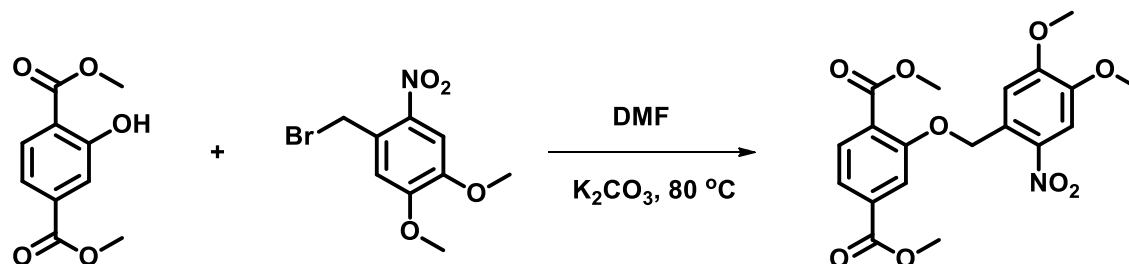

*Dimethyl 2-((4,5-dimethoxy-2-nitrobenzyl)oxy)terephthalate.* Dimethyl-2-hydroxyterephthalate (1.2 g, 5.6 mmol) was dissolved in 60 mL of DMF. 4,5-Dimethoxy-2-nitrobenzyl bromide (2.0 g, 7.3 mmol) and K<sub>2</sub>CO<sub>3</sub> (1.5 g, 11.1 mmol) were added and the mixture was stirred at 80 °C for 1 h. While hot, the K<sub>2</sub>CO<sub>3</sub> was filtered off, and water was added to the filtrate to precipitate out the product. The pale yellow solid was isolated by vacuum filtration and washed with MeOH to remove any unreacted starting materials. Yield: 2.04 g (90%). <sup>1</sup>H NMR (CDCl<sub>3</sub>, 400 MHz, 25 °C): δ 3.89 (s, 3H; CO<sub>2</sub>CH<sub>3</sub>), 3.97 (s, 3H; OCH<sub>3</sub>), 3.99 (s, 3H; OCH<sub>3</sub>), 4.13 (s, 3H; CO<sub>2</sub>CH<sub>3</sub>), 5.62 (s, 2H, CH<sub>2</sub>) 7.72 (d, 1H; ArH), 7.80 (s, 2H; ArH), 7.94 (d, 1H; ArH), 8.06 (s, 1H; ArH). ESI-MS(+): *m/z* 405.69[M+H]<sup>+</sup>, 427.98[M+Na]<sup>+</sup>.

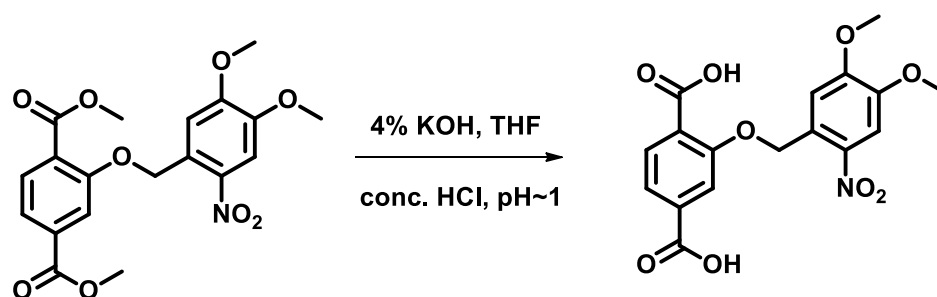

*2-((4,5-dimethoxy-2-nitrobenzyl)oxy)terephthalic acid.* Dimethyl 2-((4,5-dimethoxy-2-nitrobenzyl)oxy)terephthalate (1.68 g, 4.1 mmol) was dissolved in 500 mL of THF followed by the addition of 4% KOH (aq) (250 mL). After stirring the solution at room temperature for 2 h, the solution was diluted with water (100 mL) and washed with diethyl ether twice (50 mL). The aqueous layer was collected and acidified to pH~1 using concentrated HCl to precipitate out a yellow solid. The solid was isolated via vacuum filtration, washed with H<sub>2</sub>O, and dried under vacuum at room temperature. Yield: 1.27 g (81%). <sup>1</sup>H NMR (*d*<sup>6</sup>-DMSO, 400 MHz, 25 °C): δ 3.88 (s, 3H; OCH<sub>3</sub>), 3.94 (s, 3H; OCH<sub>3</sub>), 5.58 (s, 2H, CH<sub>2</sub>) 7.61 (d, 1H; ArH), 7.69 (s, 1H; ArH), 7.75 (s, 1H; ArH), 7.88 (d, 2H; ArH). ESI-MS(-): *m/z* 375.85[M-H]<sup>-</sup>.

*IRMOF-1-OH Direct Synthesis Attempt.* Under identical conditions to IRMOF-1-L1 no solid material was obtained.

*IRMOF-1-(OH)(NH<sub>2</sub>) Direct Synthesis Attempt.* Under identical solvothermal conditions to IRMOF-1-(L1)(NH<sub>2</sub>), using varying ratios of NH<sub>2</sub>-BDC to HO-BDC, no solids were obtained that incorporated both ligands in either DMF or DEF.

## Characterization

*<sup>1</sup>H NMR analysis.* Approximately 5 mg of MOF was dried under vacuum at 100 °C (or used immediately after BET analysis) and digested in 500 μL of *d*<sup>6</sup>-DMSO and 100 μL of dilute DCl (23 μL of 35% DCl in D<sub>2</sub>O diluted with 1.0 mL of *d*<sup>6</sup>-DMSO). All percentages of PSD are reported from two independent samples.

*Analysis by ESI-MS.* Samples for analysis were prepared by taking 10 μL of <sup>1</sup>H NMR solution diluted with 1 mL MeOH.

*Thermal Analysis.* Approximately 10-20 mg of MOF (following BET analysis) was used for these measurements. Samples were analyzed under a dinitrogen stream from room temperature to 600 °C at 5 °C/min.

*PXRD Analysis.* Approximately 15 mg of MOF (soaked in DMF) was air dried prior to PXRD analysis. Powder X-ray diffraction (PXRD) data were collected at ambient temperature with a scan speed of 0.5 sec/step, step size of 0.02° in 2θ, and a 2θ range of 3-40 °.

*BET Surface Area Analysis.* Approximately 60-100 mg of MOF (previously in CHCl<sub>3</sub>) was evacuated on a vacuum line for <1 min at RT. The sample was transferred to a preweighed sample tube and degassed at 105 °C (25 °C for L2 containing samples) for a minimum of 12 h or until the outgas rate was < 5 μmHg. The sample tube was re-weighed to obtain a consistent sample mass. BET surface area (m<sup>2</sup>/g) measurements were collected on at least three independent samples of each MOF at 77 K by dinitrogen using the volumetric technique.

*Single Crystal X-ray Diffraction.* Single crystals of IRMOF-1-L1, IRMOF-1-L1 after being exposed to 365 nm for 48h, IRMOF-1-L2, and IRMOF-1-(L1)(NH<sub>2</sub>) were mounted on nylon loops with Paratone oil and placed under a nitrogen cold stream (200 K). A semiempirical method utilizing equivalents was employed to correct for absorption. All data collections were solved and refined using SHELXTL and treated with the “squeeze” protocol in PLATON to account for electron density associated with the nitrobenzyl groups and disordered solvent molecules within the framework.

*Solid State UV-Vis analysis.* Approximately 15 mg of IRMOF (soaked in CHCl<sub>3</sub>) was air dried for UV-Vis analysis.

*UV-Vis Spectroscopy.* Absorption spectra of a 1.0 mL solution of methyl diester form of the ligands was prepared at 50 μM concentration in EtOAc and spectra were collected at room temperature.

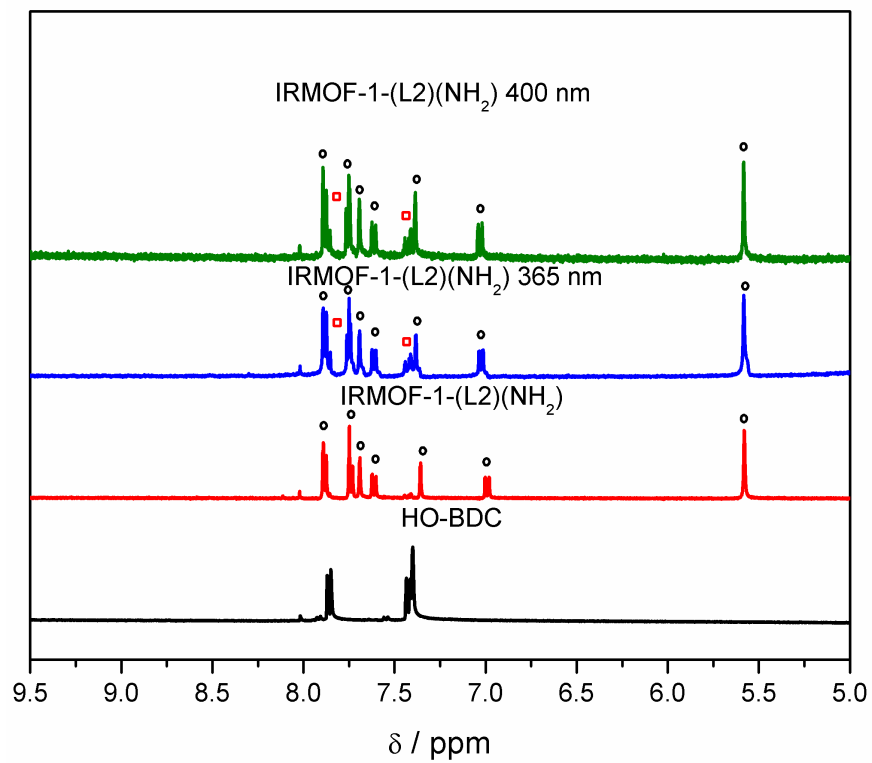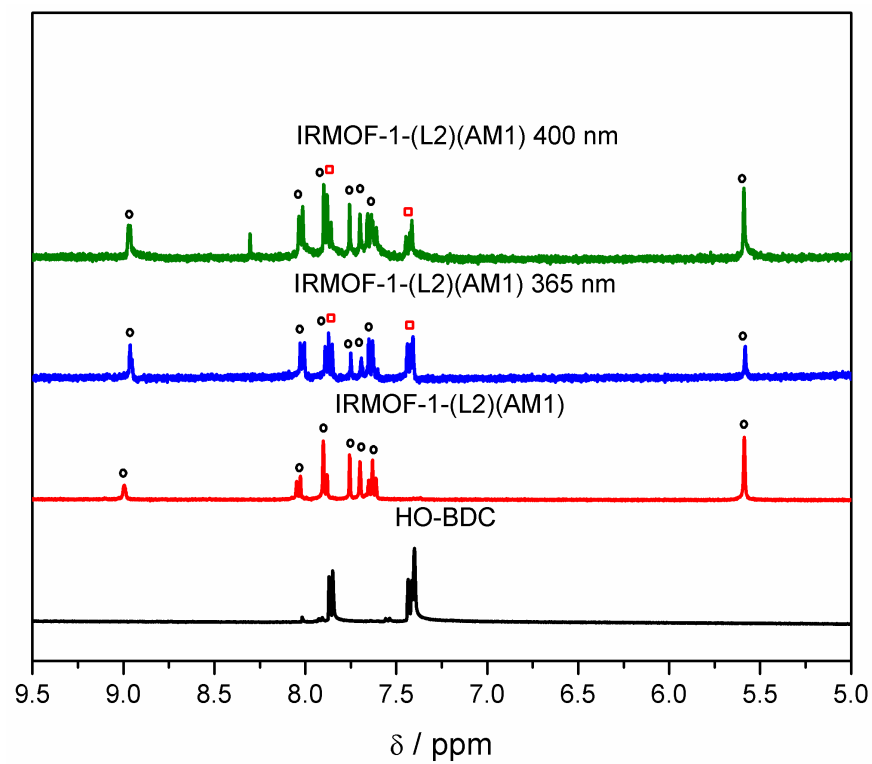

**Fig. S1** <sup>1</sup>H NMR comparison of IRMOF-1-(L2)(NH<sub>2</sub>) and IRMOF-1-(L2)(AM1) before and after PSD at 365 nm or 400 nm.

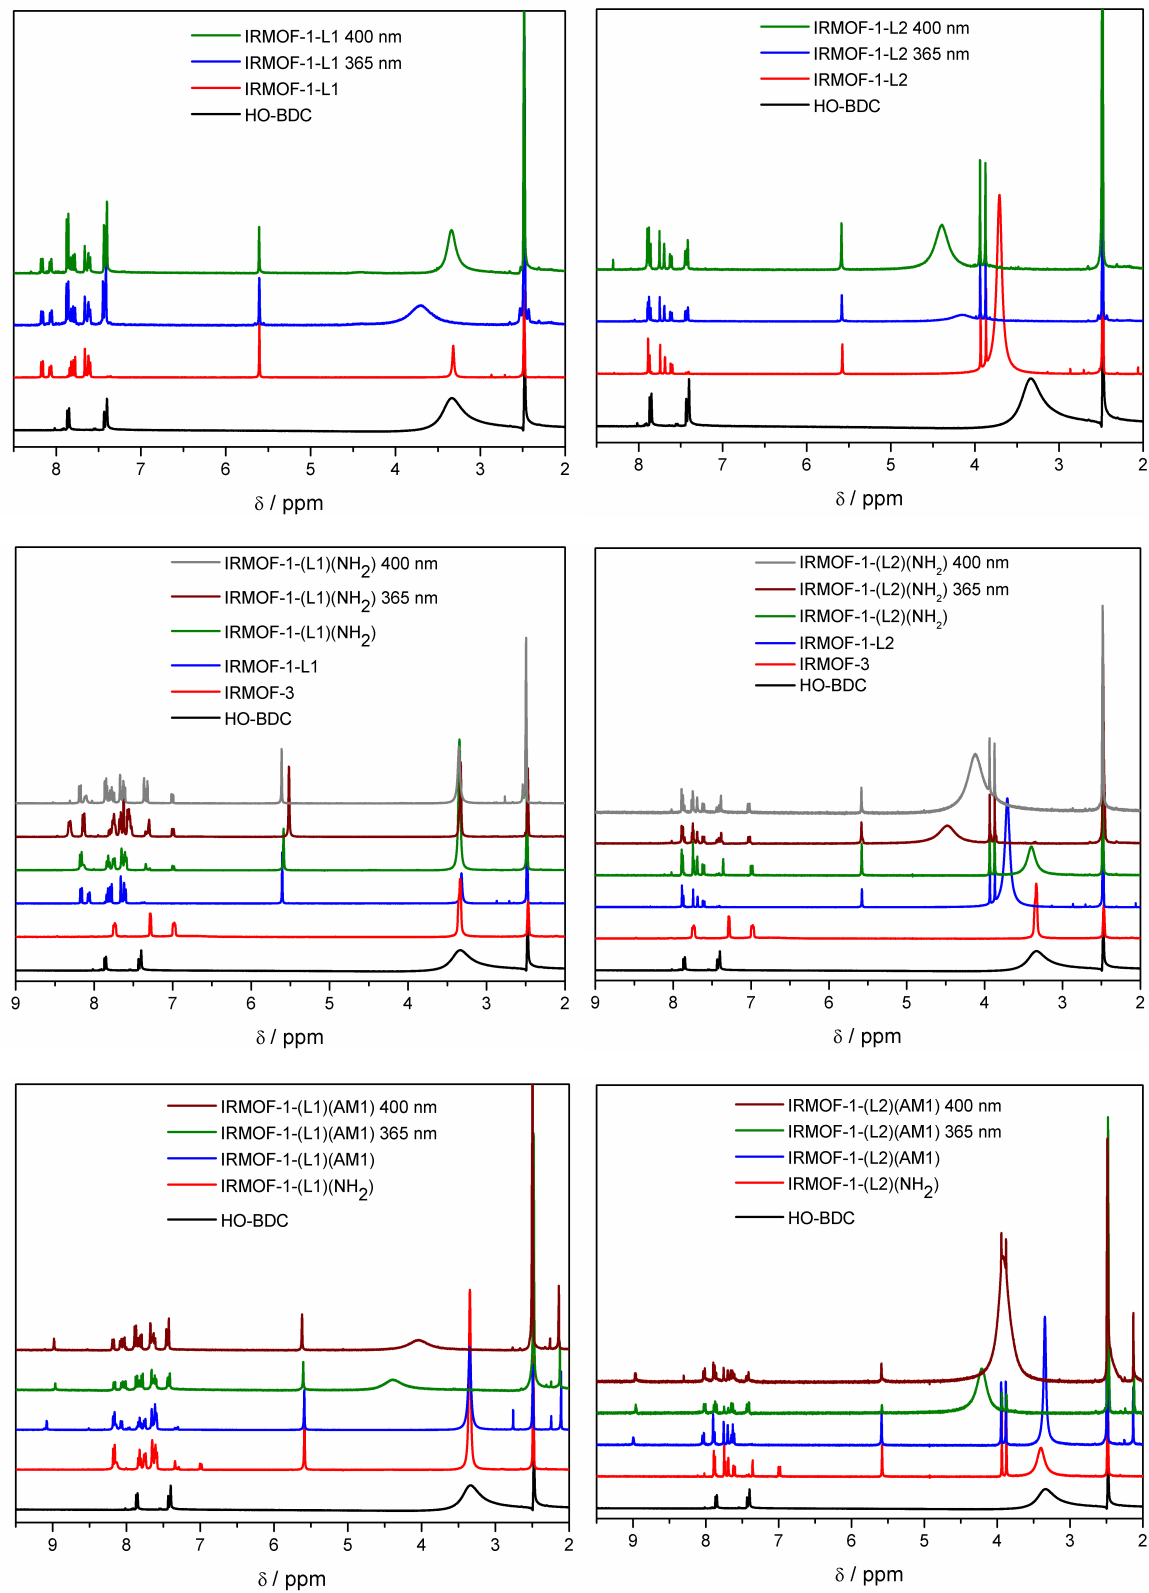

**Fig. S2** Complete  $^1\text{H}$  NMR spectra of IRMOFs before and after PSD at 365 nm or 400 nm.

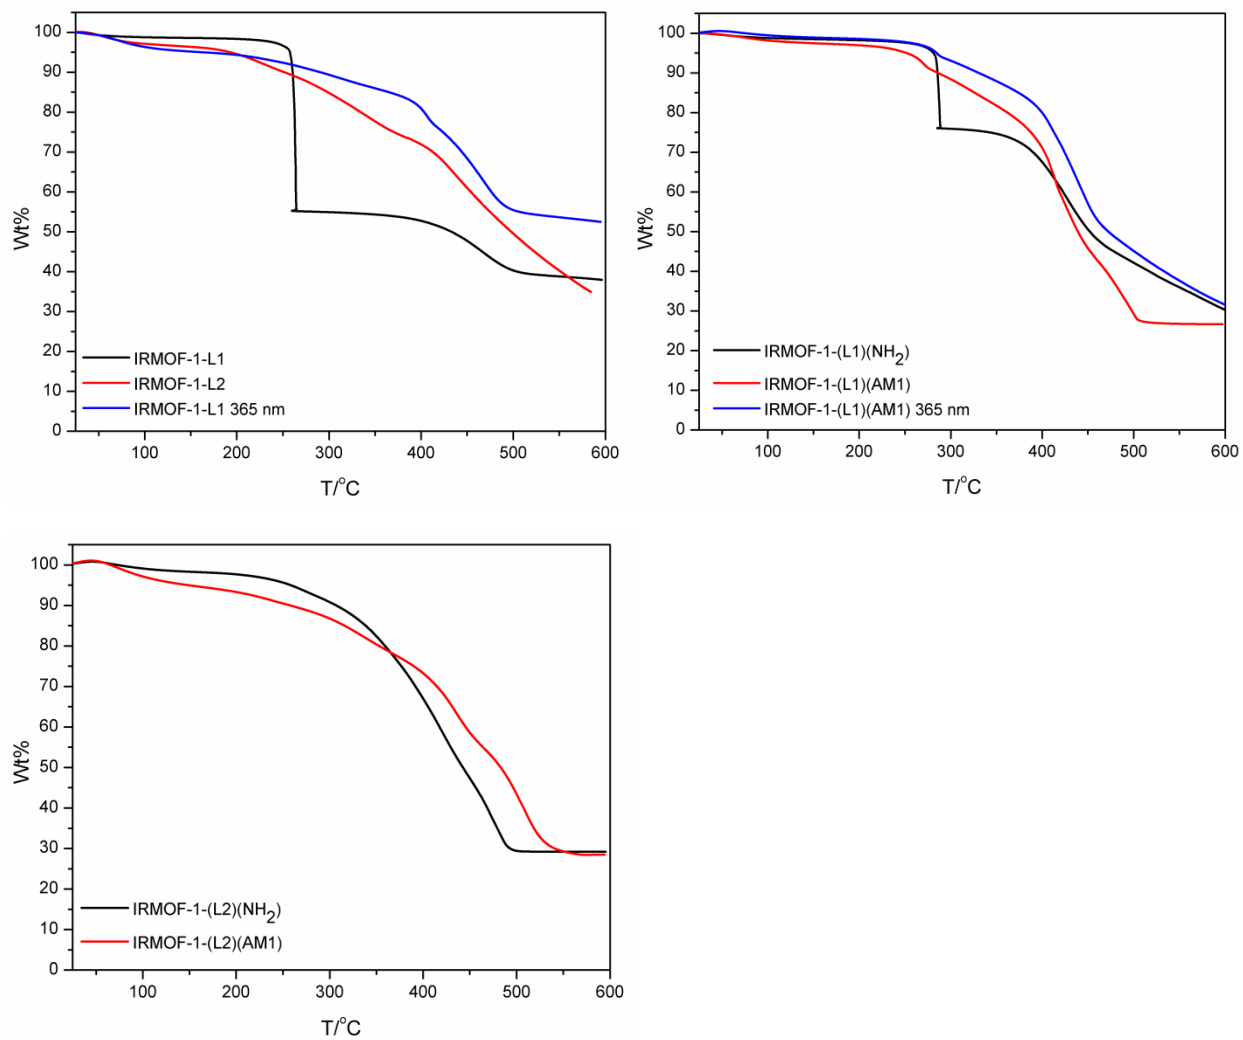

**Fig. S3** TGA traces of IRMOFs.

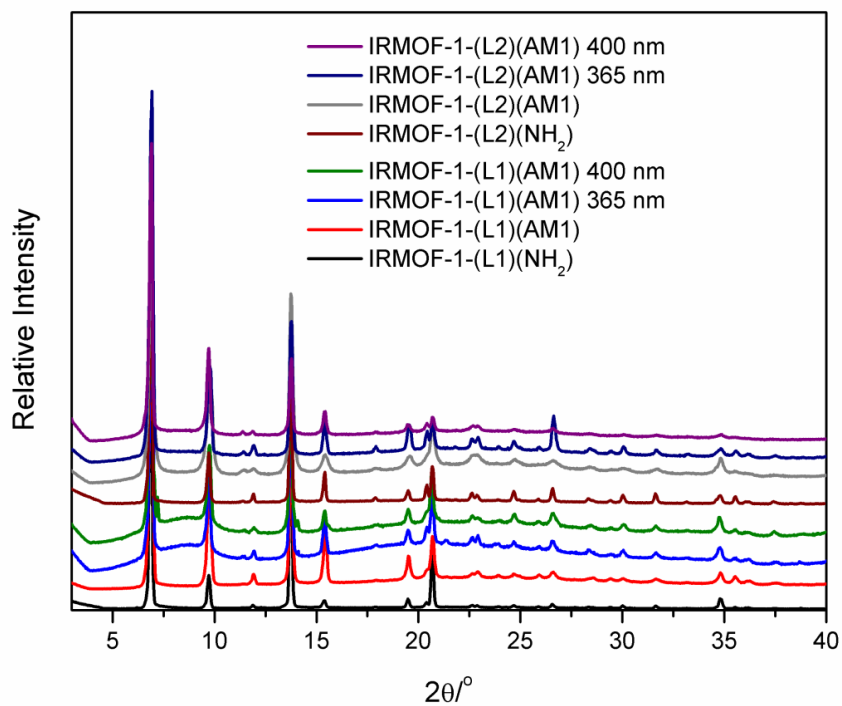

Fig. S4 PXR D spectra of IRMOFs.

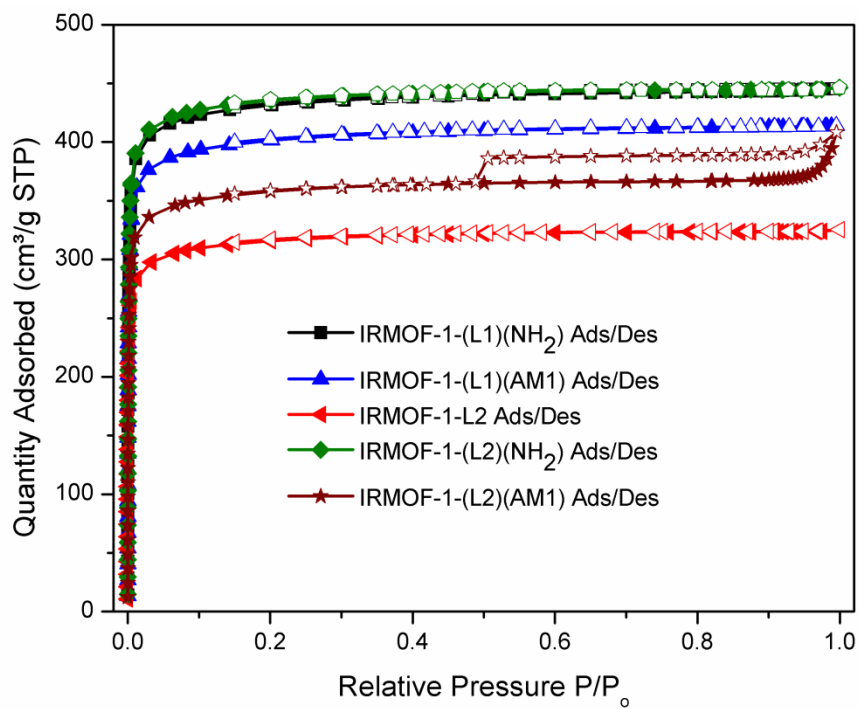

Fig. S5 Dinitrogen isotherms of IRMOFs prior to PSD.

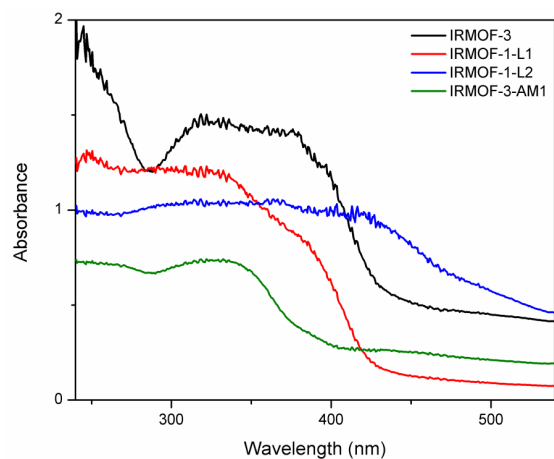

**Fig. S6** Solid state UV-Vis spectra of IRMOFs.

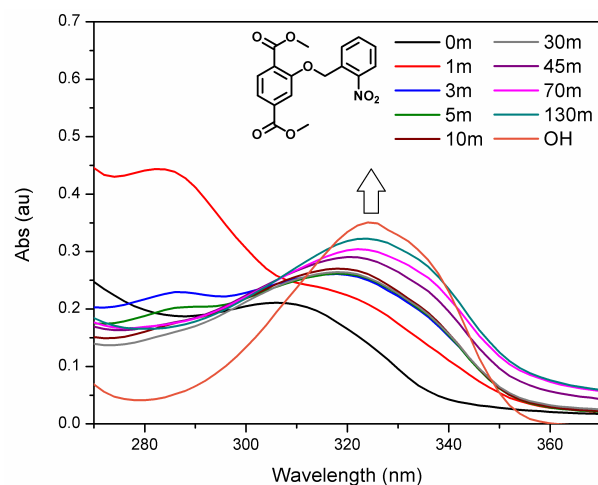

**Fig. S7** Solution UV-Vis spectra of esterified L1 irradiated at 365 nm. The increase at 288 nm is due to the liberated nitrosobenzaldehyde that undergoes photodecomposition upon prolonged exposure to light (M. Gaplovsky, Y. V. Il'ichev, Y. Kamdzhilov, S. V. Kombarova, M. Mac, M. A. Schworer and J. Wirz, *Photochem. Photobiol. Sci.*, 2005, **4**, 33-42). A clean isosbestic point is not observed due to various byproducts of the PSD reaction.



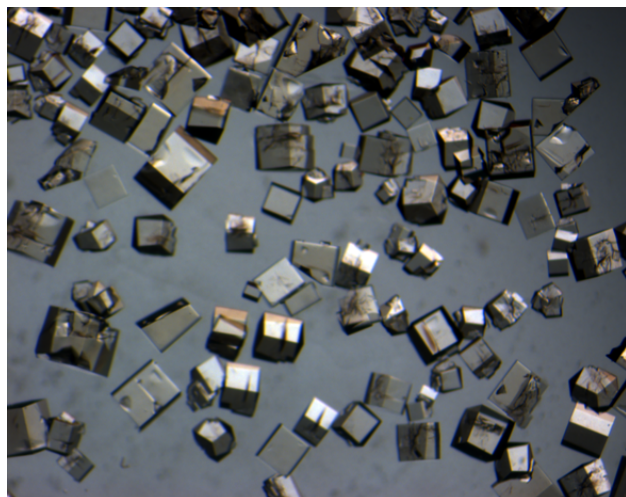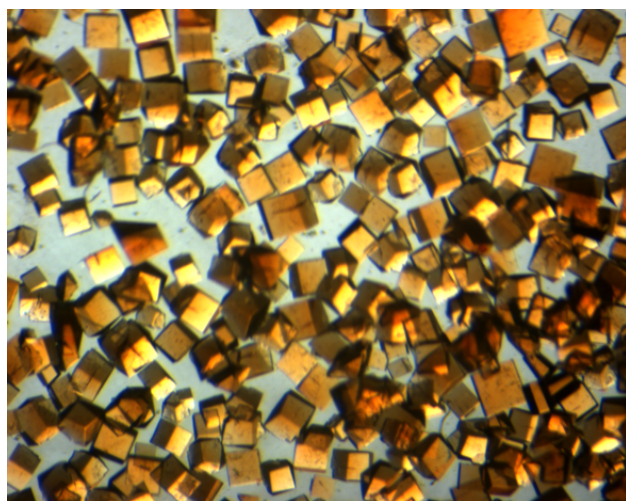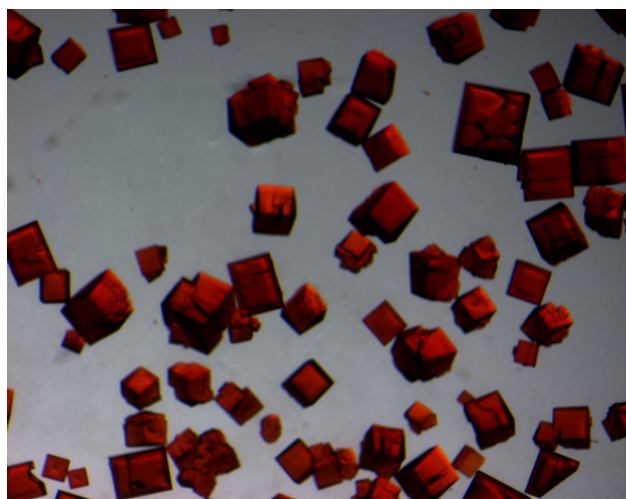

**Fig. S8** Photographs of crystals of IRMOF-1-L1 (top), IRMOF-1-L2 (middle), and IRMOF-1-OH (bottom) generated from IRMOF-1-L1 after irradiation at 365 nm.

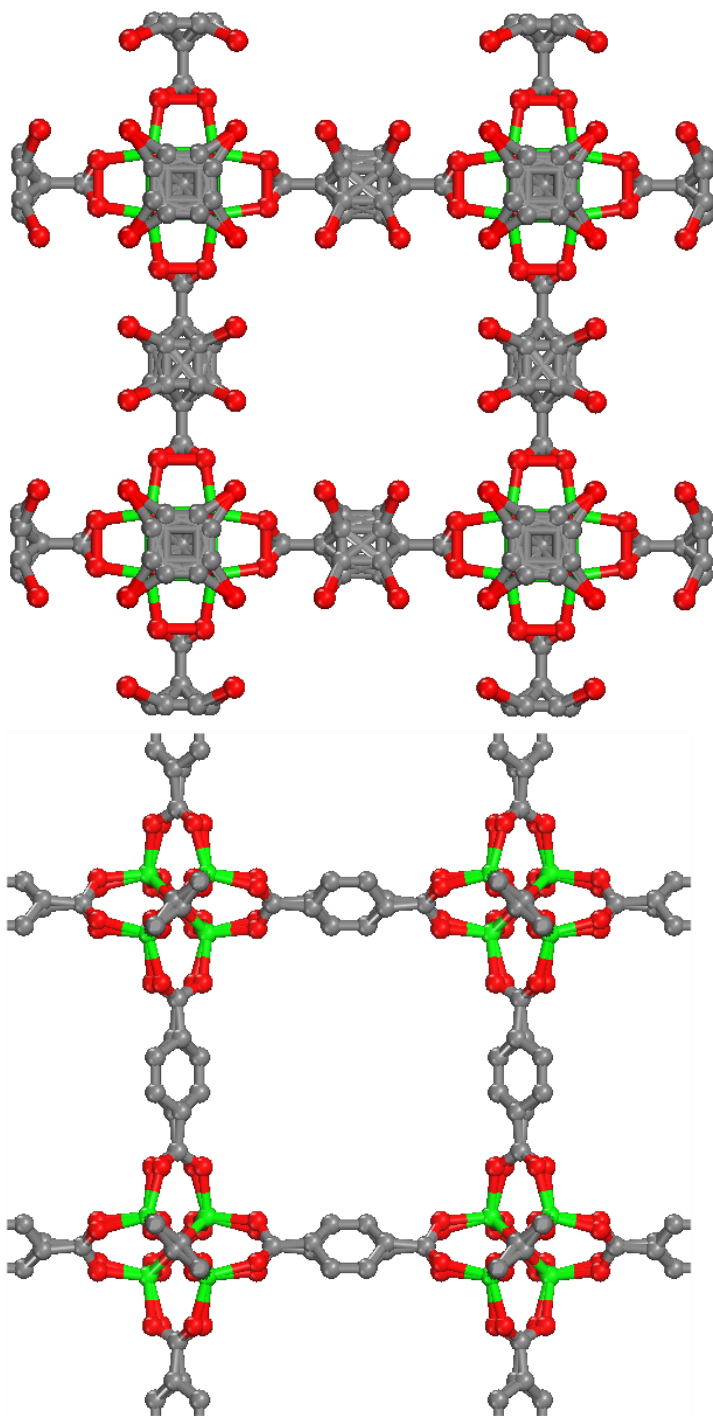

**Fig. S9** X-ray crystal structure for IRMOF-1-L1 before (top) and after (bottom) PSD at 365 nm. While the structure of IRMOF-1-L1 possesses some significant disorder and is found in a different space group than many IRMOF crystals, the structure obtained and powder pattern confirm the expected IRMOF topology.

**Table S1.** Crystal data and structure refinement for IRMOF-1-L1.

|                                   |                                                                                                                                                            |
|-----------------------------------|------------------------------------------------------------------------------------------------------------------------------------------------------------|
| Identification code               | IRMOF-1-L1                                                                                                                                                 |
| Empirical formula                 | C <sub>45</sub> H <sub>21</sub> N <sub>3</sub> O <sub>22</sub> Zn <sub>4</sub>                                                                             |
| Formula weight                    | 1210.78                                                                                                                                                    |
| Temperature                       | 200 (2) K                                                                                                                                                  |
| Wavelength                        | 0.71073 Å                                                                                                                                                  |
| Crystal system                    | Cubic                                                                                                                                                      |
| Space group                       | <i>Pm-3m</i>                                                                                                                                               |
| Unit cell dimensions              | $a = 12.8489(12) \text{ \AA}$ $\alpha = 90^\circ$<br>$b = 12.8489(12) \text{ \AA}$ $\beta = 90^\circ$<br>$c = 12.8489(12) \text{ \AA}$ $\gamma = 90^\circ$ |
| Volume                            | 2121.3(3) Å <sup>3</sup>                                                                                                                                   |
| Z                                 | 2                                                                                                                                                          |
| Density (calculated)              | 1.587 Mg/m <sup>3</sup>                                                                                                                                    |
| Absorption coefficient            | 2.318 mm <sup>-1</sup>                                                                                                                                     |
| F(000)                            | 992                                                                                                                                                        |
| Crystal size                      | 0.50 x 0.50 x 0.10 mm <sup>3</sup>                                                                                                                         |
| Theta range for data collection   | 1.58 to 25.26°.                                                                                                                                            |
| Index ranges                      | -15 ≤ h ≤ 13, -15 ≤ k ≤ 15, -15 ≤ l ≤ 15                                                                                                                   |
| Reflections collected             | 12150                                                                                                                                                      |
| Independent reflections           | 446 [R(int) = 0.0419]                                                                                                                                      |
| Completeness to theta = 25.26°    | 100.0 %                                                                                                                                                    |
| Max. and min. transmission        | 0.5431 and 0.3903                                                                                                                                          |
| Refinement method                 | Full-matrix least-squares on F <sup>2</sup>                                                                                                                |
| Data / restraints / parameters    | 446 / 1 / 32                                                                                                                                               |
| Goodness-of-fit on F <sup>2</sup> | 1.644                                                                                                                                                      |
| Final R indices [I > 2σ(I)]       | R1 = 0.1116, wR2 = 0.3415                                                                                                                                  |
| R indices (all data)              | R1 = 0.1173, wR2 = 0.3490                                                                                                                                  |
| Largest diff. peak and hole       | 1.452 and -1.516 e.Å <sup>-3</sup>                                                                                                                         |

**Table S2** Crystal data and structure refinement for IRMOF-1-OH, generated by irradiation of IRMOF-1-L1 at 365 nm.

|                                   |                                                                                                                                                                  |
|-----------------------------------|------------------------------------------------------------------------------------------------------------------------------------------------------------------|
| Identification code               | IRMOF-1-OH                                                                                                                                                       |
| Empirical formula                 | C <sub>24</sub> H O <sub>16</sub> Zn <sub>4</sub>                                                                                                                |
| Formula weight                    | 811.73                                                                                                                                                           |
| Temperature                       | 200 K                                                                                                                                                            |
| Wavelength                        | 0.71073 Å                                                                                                                                                        |
| Crystal system                    | Cubic                                                                                                                                                            |
| Space group                       | <i>Fm-3m</i>                                                                                                                                                     |
| Unit cell dimensions              | $a = 25.8059(14) \text{ \AA}$ $\alpha = 90^\circ$ .<br>$b = 25.8059(14) \text{ \AA}$ $\beta = 90^\circ$ .<br>$c = 25.8059(14) \text{ \AA}$ $\gamma = 90^\circ$ . |
| Volume                            | 17185.3(16) Å <sup>3</sup>                                                                                                                                       |
| Z                                 | 16                                                                                                                                                               |
| Density (calculated)              | 0.586 Mg/m <sup>3</sup>                                                                                                                                          |
| Absorption coefficient            | 1.124 mm <sup>-1</sup>                                                                                                                                           |
| F(000)                            | 2944                                                                                                                                                             |
| Crystal size                      | 0.50 x 0.50 x 0.30 mm <sup>3</sup>                                                                                                                               |
| Theta range for data collection   | 1.37 to 25.37°                                                                                                                                                   |
| Index ranges                      | -31 ≤ h ≤ 31, -31 ≤ k ≤ 31, -29 ≤ l ≤ 29                                                                                                                         |
| Reflections collected             | 22285                                                                                                                                                            |
| Independent reflections           | 850 [R(int) = 0.0342]                                                                                                                                            |
| Completeness to theta = 25.37°    | 100.0 %                                                                                                                                                          |
| Max. and min. transmission        | 0.7292 and 0.6035                                                                                                                                                |
| Refinement method                 | Full-matrix least-squares on F <sup>2</sup>                                                                                                                      |
| Data / restraints / parameters    | 850 / 0 / 30                                                                                                                                                     |
| Goodness-of-fit on F <sup>2</sup> | 1.124                                                                                                                                                            |
| Final R indices [I > 2σ(I)]       | R1 = 0.0925, wR2 = 0.2435                                                                                                                                        |
| R indices (all data)              | R1 = 0.0966, wR2 = 0.2557                                                                                                                                        |
| Largest diff. peak and hole       | 5.055 and -0.951 e.Å <sup>-3</sup>                                                                                                                               |

**Table S3.** Crystal data and structure refinement for IRMOF-1-L2.

|                                   |                                                                                                                                                            |
|-----------------------------------|------------------------------------------------------------------------------------------------------------------------------------------------------------|
| Identification code               | IRMOF-1-L2                                                                                                                                                 |
| Empirical formula                 | C <sub>51</sub> H <sub>39</sub> N <sub>2</sub> O <sub>28</sub> Zn <sub>4</sub>                                                                             |
| Formula weight                    | 1396.89                                                                                                                                                    |
| Temperature                       | 200 (2) K                                                                                                                                                  |
| Wavelength                        | 0.71073 Å                                                                                                                                                  |
| Crystal system                    | Cubic                                                                                                                                                      |
| Space group                       | <i>Fm-3m</i>                                                                                                                                               |
| Unit cell dimensions              | $a = 25.686(3) \text{ \AA}$ $\alpha = 90^\circ$ .<br>$b = 25.686(3) \text{ \AA}$ $\beta = 90^\circ$ .<br>$c = 25.686(3) \text{ \AA}$ $\gamma = 90^\circ$ . |
| Volume                            | 16947(4) Å <sup>3</sup>                                                                                                                                    |
| Z                                 | 16                                                                                                                                                         |
| Density (calculated)              | 0.594 Mg/m <sup>3</sup>                                                                                                                                    |
| Absorption coefficient            | 1.139 mm <sup>-1</sup>                                                                                                                                     |
| F(000)                            | 2944                                                                                                                                                       |
| Crystal size                      | 0.35 x 0.35 x 0.20 mm <sup>3</sup>                                                                                                                         |
| Theta range for data collection   | 1.37 to 25.31°.                                                                                                                                            |
| Index ranges                      | -23 ≤ h ≤ 30, -30 ≤ k ≤ 10, -<br>27 ≤ l ≤ 21                                                                                                               |
| Reflections collected             | 8788                                                                                                                                                       |
| Independent reflections           | 836 [R(int) = 0.0458]                                                                                                                                      |
| Completeness to theta = 25.31°    | 100.0 %                                                                                                                                                    |
| Max. and min. transmission        | 0.8042 and 0.6912                                                                                                                                          |
| Refinement method                 | Full-matrix least-squares on<br>F <sup>2</sup>                                                                                                             |
| Data / restraints / parameters    | 836 / 0 / 25                                                                                                                                               |
| Goodness-of-fit on F <sup>2</sup> | 1.094                                                                                                                                                      |
| Final R indices [I > 2σ(I)]       | R1 = 0.0650, wR2 = 0.1811                                                                                                                                  |
| R indices (all data)              | R1 = 0.0827, wR2 = 0.1989                                                                                                                                  |
| Largest diff. peak and hole       | 1.075 and -0.398 e.Å <sup>-3</sup>                                                                                                                         |

**Table S4.** Crystal data and structure refinement for IRMOF-1-(L1)(NH<sub>2</sub>).

|                                   |                                                                                                                                                               |
|-----------------------------------|---------------------------------------------------------------------------------------------------------------------------------------------------------------|
| Identification code               | IRMOF-1-(L1)(NH <sub>2</sub> )                                                                                                                                |
| Empirical formula                 | C <sub>38</sub> H <sub>23</sub> N <sub>3</sub> O <sub>19</sub> Zn <sub>4</sub>                                                                                |
| Formula weight                    | 1080.81                                                                                                                                                       |
| Temperature                       | 200(2) K                                                                                                                                                      |
| Wavelength                        | 0.71073 Å                                                                                                                                                     |
| Crystal system                    | Cubic                                                                                                                                                         |
| Space group                       | <i>Fm-3m</i>                                                                                                                                                  |
| Unit cell dimensions              | $a = 25.545(14) \text{ \AA}$ $\alpha = 90^\circ$ .<br>$b = 25.545(14) \text{ \AA}$ $\beta = 90^\circ$ .<br>$c = 25.545(14) \text{ \AA}$ $\gamma = 90^\circ$ . |
| Volume                            | 16669(16) Å <sup>3</sup>                                                                                                                                      |
| Z                                 | 16                                                                                                                                                            |
| Density (calculated)              | 0.604 Mg/m <sup>3</sup>                                                                                                                                       |
| Absorption coefficient            | 1.158 mm <sup>-1</sup>                                                                                                                                        |
| F(000)                            | 2944                                                                                                                                                          |
| Crystal size                      | 0.50 x 0.50 x 0.30 mm <sup>3</sup>                                                                                                                            |
| Theta range for data collection   | 1.59 to 25.70°.                                                                                                                                               |
| Index ranges                      | -31 ≤ h ≤ 31, -31 ≤ k ≤ 30, -<br>28 ≤ l ≤ 30                                                                                                                  |
| Reflections collected             | 34575                                                                                                                                                         |
| Independent reflections           | 861 [R(int) = 0.0558]                                                                                                                                         |
| Completeness to theta = 25.70°    | 99.9 %                                                                                                                                                        |
| Max. and min. transmission        | 0.7226 and 0.5951                                                                                                                                             |
| Refinement method                 | Full-matrix least-squares on<br>F <sup>2</sup>                                                                                                                |
| Data / restraints / parameters    | 861 / 0 / 14                                                                                                                                                  |
| Goodness-of-fit on F <sup>2</sup> | 2.099                                                                                                                                                         |
| Final R indices [I > 2σ(I)]       | R1 = 0.1774, wR2 = 0.4137                                                                                                                                     |
| R indices (all data)              | R1 = 0.2051, wR2 = 0.4524                                                                                                                                     |
| Largest diff. peak and hole       | 2.072 and -1.050 e.Å <sup>-3</sup>                                                                                                                            |
